# Supplementary material
Source: PubMed Central journal article supplement (PMC3979456)
Supplement: NIHMS567505-supplement-01.pdf [file NIHMS567505-supplement-01.pdf]

## Supplementary Online Content

Shah DJ, Kim HW, James O, et al. Prevalence of regional myocardial thinning and relationship with myocardial scarring in patients with coronary artery disease. *JAMA*. doi:10.1001/jama.2013.1381

**eTable 1.** Relationship of Baseline Characteristics With Limited Scarring Among Patients With Wall Thinning (n=201)

**eTable 2.** Relationship of Baseline Characteristics With Functional and Remodeling Changes After Revascularization

This supplementary material has been provided by the authors to give readers additional information about their work.

**eTable 1.** Relationship of Baseline Characteristics With Limited Scarring Among Patients With Wall Thinning (n=201)<sup>a</sup>

| Characteristic                                      | Bivariable Odds Ratio (95% CI) | P    | Multivariable Odds Ratio (95% CI) | P    |
|-----------------------------------------------------|--------------------------------|------|-----------------------------------|------|
| Age (years)                                         | 1.03 (0.99-1.06)               | 0.11 |                                   |      |
| Gender (male)                                       | 0.81 (0.35-1.89)               | 0.63 |                                   |      |
| Cardiac Risk Factors                                |                                |      |                                   |      |
| Hypercholesterolemia                                | 0.56 (0.24-1.28)               | 0.17 |                                   |      |
| Hypertension                                        | 1.44 (0.66-3.11)               | 0.36 |                                   |      |
| Cigarette Smoking                                   | 1.70 (0.81-3.55)               | 0.16 |                                   |      |
| Family History of Premature CAD                     | 1.47 (0.70-3.10)               | 0.31 |                                   |      |
| Diabetes                                            | 0.92 (0.41-2.05)               | 0.84 |                                   |      |
| Number of Risk Factors                              | 1.17 (0.83-1.66)               | 0.37 |                                   |      |
| Symptoms                                            |                                |      |                                   |      |
| Angina                                              | 1.14 (0.59-2.20)               | 0.70 |                                   |      |
| NYHA Functional Status (Mean Classification Score)  | 1.06 (0.71-1.57)               | 0.78 |                                   |      |
| Cardiac History                                     |                                |      |                                   |      |
| Prior Myocardial Infarction                         | 0.62 (0.29-1.31)               | 0.21 |                                   |      |
| Prior Revascularization                             | 0.79 (0.38-1.65)               | 0.53 |                                   |      |
| Cardiac Medications                                 |                                |      |                                   |      |
| Beta-blockers                                       | 0.68 (0.32-1.45)               | 0.31 |                                   |      |
| ACE-Inhibitors and/or Angiotensin Receptor Blockers | 0.81 (0.39-1.69)               | 0.57 |                                   |      |
| HMG Reductase Inhibitors                            | 0.66 (0.32-1.36)               | 0.26 |                                   |      |
| Aspirin                                             | 0.71 (0.32-1.58)               | 0.40 |                                   |      |
| Thienopyridines                                     | 0.41 (0.09-1.84)               | 0.25 |                                   |      |
| Electrocardiogram <sup>b</sup>                      |                                |      |                                   |      |
| Any Q waves                                         | 0.76 (0.36-1.60)               | 0.47 |                                   |      |
| Selvester Score <sup>c</sup>                        | 0.87 (0.78-0.97)               | 0.01 | 0.87 (0.78-0.97)                  | 0.01 |
| X-Ray Coronary Angiography <sup>d</sup>             |                                |      |                                   |      |
| Number of Vessels With CAD (stenosis ≥ 70%)         | 1.08 (0.72-1.62)               | 0.70 |                                   |      |
| Maximum Stenosis in Artery to Thinned Region (%)    | 1.03 (1.00-1.05)               | 0.03 | 1.03 (1.00-1.06)                  | 0.03 |
| Rentrop Collateral Score to Thinned Region          | 1.44 (1.09-1.90)               | 0.01 | 1.28 (0.94-1.76)                  | 0.12 |
| Cardiovascular Magnetic Resonance                   |                                |      |                                   |      |
| Global                                              |                                |      |                                   |      |
| LV Ejection Fraction (%)                            | 1.02 (0.99-1.05)               | 0.22 |                                   |      |
| % LV Surface Area Thinned                           | 0.98 (0.96-1.01)               | 0.17 |                                   |      |
| Thinned Region                                      |                                |      |                                   |      |
| End Diastolic Wall Thickness (mm)                   | 1.76 (1.10-2.83)               | 0.02 | 1.86 (1.12-3.12)                  | 0.02 |
| End Systolic Wall Thickness (mm)                    | 1.21 (0.80-1.84)               | 0.36 |                                   |      |

<sup>a</sup> Based on ≤ 50% scar in the thinned region. For categorical variables, the reference increment is per 1-unit change.

<sup>b</sup> Available in 195 patients.

<sup>c</sup> Infarct size as determined by the ECG was estimated using the 32-point Selvester QRS scoring system, in which each point was designed to represent approximately 3% of LV mass.

<sup>d</sup> Available in 199 patients.

**eTable 2.** Relationship of Baseline Characteristics With Functional and Remodeling Changes After Revascularization

| Characteristic                           | FUNCTIONAL                              |      |                      |      |                      |      |                      |      | REMODELING                                  |      |                      |      |
|------------------------------------------|-----------------------------------------|------|----------------------|------|----------------------|------|----------------------|------|---------------------------------------------|------|----------------------|------|
|                                          | Change in Systolic Wall Thickening (mm) |      |                      |      | Change in LVEF (%)   |      |                      |      | Change in End Diastolic Wall Thickness (mm) |      |                      |      |
|                                          | Bivariable                              |      | Multivariable        |      | Bivariable           |      | Multivariable        |      | Bivariable                                  |      | Multivariable        |      |
|                                          | Coefficient (95% CI)                    | P    | Coefficient (95% CI) | P    | Coefficient (95% CI) | P    | Coefficient (95% CI) | P    | Coefficient (95% CI)                        | P    | Coefficient (95% CI) | P    |
| <b>Clinical</b>                          |                                         |      |                      |      |                      |      |                      |      |                                             |      |                      |      |
| Age                                      | 0.01 (-0.02-0.05)                       | 0.41 |                      |      | 0.21 (-0.12-0.53)    | 0.21 |                      |      | 0.02 (-0.02-0.07)                           | 0.26 |                      |      |
| Gender (men)                             | -0.69 (-1.62-0.24)                      | 0.14 |                      |      | -5.05 (-13.90-3.79)  | 0.26 |                      |      | -0.68 (-1.88-0.52)                          | 0.26 |                      |      |
| Hypercholesterolemia                     | -0.37 (-1.25-0.52)                      | 0.41 | 0.14 (-0.51-0.79)    | 0.66 | -8.93 (-16.8, -1.03) | 0.03 | -3.98 (-10.7-2.76)   | 0.24 | -0.51 (-1.63-0.62)                          | 0.37 |                      |      |
| Hypertension                             | -0.14 (-0.93-0.66)                      | 0.73 |                      |      | -1.82 (-9.26-5.61)   | 0.62 |                      |      | 0.34 (-0.66-1.35)                           | 0.50 |                      |      |
| Cigarette Smoking                        | -0.08 (-0.86-0.71)                      | 0.84 |                      |      | 1.71 (-5.66-9.08)    | 0.64 |                      |      | -0.44 (-1.43-0.55)                          | 0.38 |                      |      |
| Family History of Premature CAD          | 0.25 (-0.59-1.10)                       | 0.55 |                      |      | 4.07 (-3.81-11.95)   | 0.30 |                      |      | -0.54 (-1.61-0.53)                          | 0.31 |                      |      |
| Diabetes                                 | 0.02 (-0.98-1.02)                       | 0.97 |                      |      | 1.28 (-8.11-10.67)   | 0.78 |                      |      | 0.65 (-0.60-1.91)                           | 0.30 |                      |      |
| Number of Risk Factors (0-5)             | -0.06 (-0.41-0.30)                      | 0.75 |                      |      | -0.56 (-3.92-2.80)   | 0.74 |                      |      | -0.12 (-0.57-0.34)                          | 0.61 |                      |      |
| Angina                                   | -0.19 (-0.98-0.60)                      | 0.63 |                      |      | -2.56 (-9.97-4.85)   | 0.49 |                      |      | 0.19 (-0.82-1.19)                           | 0.71 |                      |      |
| NYHA Functional Status (1-4)             | 0.26 (-0.13-0.66)                       | 0.19 | 0.07 (-0.22-0.36)    | 0.63 | 3.78 (0.17-7.38)     | 0.04 | 1.73 (-1.27-4.74)    | 0.25 | 0.32 (-0.18-0.83)                           | 0.20 | 0.05 (-0.23-0.34)    | 0.71 |
| Prior Myocardial Infarction              | 0.25 (-0.53-1.04)                       | 0.52 |                      |      | -4.75 (-12.05-2.55)  | 0.20 |                      |      | 0.25 (-0.76-1.26)                           | 0.62 |                      |      |
| Prior Revascularization                  | 0.30 (-0.60-1.21)                       | 0.50 |                      |      | 0.04 (-9.40-9.48)    | 0.99 |                      |      | -0.20 (-1.38-0.99)                          | 0.74 |                      |      |
| Any Q Waves                              | -0.16 (-1.01-0.68)                      | 0.70 |                      |      | -3.69 (-11.58-4.21)  | 0.35 |                      |      | -0.27 (-1.35-0.81)                          | 0.61 |                      |      |
| Selvester Score (0-32 points)            | 0.04 (-0.06-0.15)                       | 0.41 |                      |      | -0.07 (-1.06-0.91)   | 0.88 |                      |      | 0.00 (-0.14-0.13)                           | 0.95 |                      |      |
| Maximum Artery Stenosis (%)              | 0.01 (-0.01-0.03)                       | 0.46 |                      |      | 0.12 (-0.07-0.32)    | 0.22 |                      |      | 0.01 (-0.02-0.04)                           | 0.40 |                      |      |
| Rentrop Score (0-3)                      | 0.06 (-0.23-0.35)                       | 0.67 |                      |      | 0.69 (-2.04-3.43)    | 0.61 |                      |      | 0.00 (-0.37-0.37)                           | 0.99 |                      |      |
| <b>Cardiovascular Magnetic Resonance</b> |                                         |      |                      |      |                      |      |                      |      |                                             |      |                      |      |
| Global                                   |                                         |      |                      |      |                      |      |                      |      |                                             |      |                      |      |
| LV Ejection Fraction (%)                 | -0.02 (-0.05-0.02)                      | 0.31 | -0.02 (-0.05-0.00)   | 0.08 | -0.36 (-0.66, -0.06) | 0.02 | -0.32 (-0.58, -0.06) | 0.02 | 0.00 (-0.04-0.05)                           | 0.92 |                      |      |

© 2013 American Medical Association. All rights reserved.

|                                   |                      |        |                      |        |                     |        |                      |        |
|-----------------------------------|----------------------|--------|----------------------|--------|---------------------|--------|----------------------|--------|
| % of LV Surface Area Thinned      | 0.02 (0.00-0.04)     | 0.08   | 0.09 (-0.12-0.29)    | 0.40   | 0.02 (-0.01-0.04)   | 0.26   | 0.01 (0.00-0.03)     | 0.07   |
| LV End Diastolic Volume (10 ml)   | 0.03 (-0.03-0.09)    | 0.34   | 0.16 (-0.42-0.74)    | 0.58   | 0.02 (-0.05-0.10)   | 0.53   |                      |        |
| LV End Systolic Volume (10 ml)    | 0.04 (-0.02-0.10)    | 0.21   | 0.39 (-0.22-0.99)    | 0.21   | 0.03 (-0.05-0.11)   | 0.48   |                      |        |
| LV Mass (100 gm)                  | -0.07 (-1.15-1.01)   | 0.89   | 5.54 (-4.53-15.61)   | 0.27   | 0.08 (-1.29-1.46)   | 0.90   |                      |        |
| Thinned Region                    |                      |        |                      |        |                     |        |                      |        |
| End Diastolic Wall Thickness (mm) | -0.01 (-0.66-0.65)   | 0.98   | 1.47 (-4.65-7.59)    | 0.63   | -0.27 (-1.10-0.55)  | 0.51   |                      |        |
| End Systolic Wall Thickness (mm)  | -0.11 (-0.64-0.43)   | 0.69   | -0.98 (-5.99-4.04)   | 0.70   | 0.01 (-0.67-0.69)   | 0.97   |                      |        |
| Systolic Wall Thickening (mm)     | -0.25 (-1.08-0.58)   | 0.55   | -4.77 (-12.45-2.92)  | 0.22   | 0.47 (-0.58-1.52)   | 0.37   |                      |        |
| Scar Extent in Thinned Region (%) | -0.03 (-0.04, -0.02) | <0.001 | -0.03 (-0.04, -0.02) | <0.001 | 0.23 (-0.34, -0.11) | <0.001 | -0.21 (-0.32, -0.11) | <0.001 |
| Model R <sup>2</sup> (adjusted)   |                      |        | 0.519, p<0.001       |        | 0.414, p<0.001      |        | -0.05 (-0.06, -0.04) | <0.001 |
|                                   |                      |        |                      |        |                     |        | 0.706, p<0.001       |        |

© 2013 American Medical Association. All rights reserved.
